# Supplementary material
Source: publisher figshare collection journal article supplement (https://acs.figshare.com/ndownloader/files/5122492)

## **Radester, A Novel Inhibitor of the Hsp90 Protein Folding Machinery**

Gang Shen and Brian S. J. Blagg<sup>\*</sup>

*Department of Medicinal Chemistry and the Center for Protein Structure and Function  
1251 Wescoe Hall Drive, Malott 4070, The University of Kansas,  
Lawrence, KS 66045-7563*

[bblagg@ku.edu](mailto:bblagg@ku.edu)

### **Supplementary Information**

#### **Spectra for Compounds**

Current Data Parameters  
 NAME sg224  
 EXPNO 2  
 PROCNO 1

F2 - Acquisition Parameters

Date\_ 20031202  
 Time 22.32  
 INSTRUM drx400  
 PROBHD 5 mm Multinuc1  
 PULPROG zg30  
 TD 32768  
 SOLVENT CDCl3  
 NS 16  
 DS 2  
 SNH 4789.272 Hz  
 FIDRES 0.146157 Hz  
 AQ 3.4210291 sec  
 RG 161.3  
 DM 104.400 usec  
 DE 4.50 usec  
 TE 300.0 K  
 D1 1.00000000 sec

===== CHANNEL f1 =====

NUC1 1H  
 P1 7.70 usec  
 PL1 -6.00 dB  
 SF01 400.1320007 MHz

F2 - Processing parameters

SI 16384  
 SF 400.1300000 MHz  
 WDW EM  
 SSB 0  
 LB 0.30 Hz  
 GB 0  
 PC 1.00

1D NMR plot parameters

CX 20.00 cm  
 CY 1.10 cm  
 F1P 11.000 ppm  
 F1 4401.43 Hz  
 F2P -1.000 ppm  
 F2 -400.13 Hz  
 PPMCM 0.60000 ppm/cm  
 HZCM 240.07800 Hz/cm

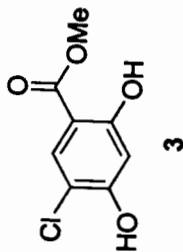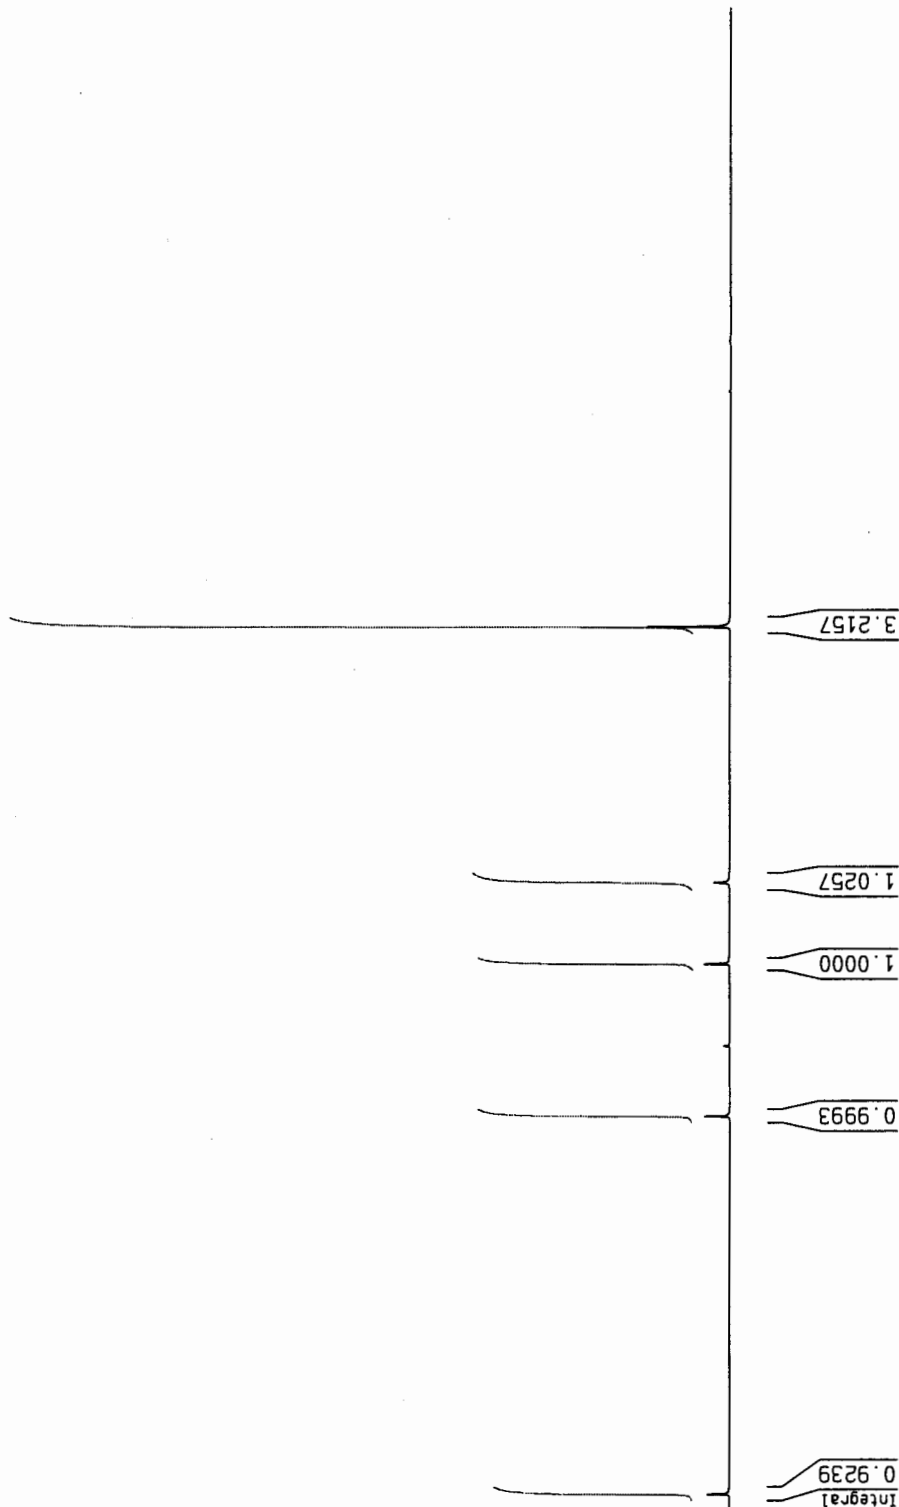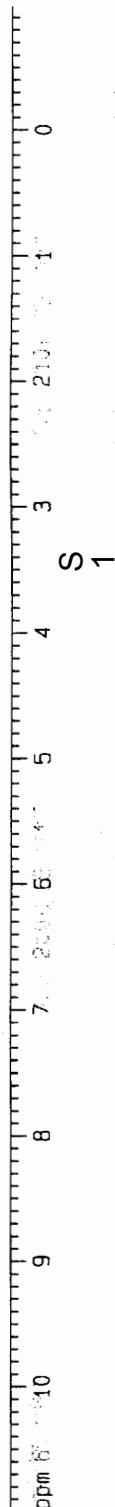

Current Data Parameters  
 NAME sg225  
 EXPNO 2  
 PROCNO 1

F2 - Acquisition Parameters  
 Date\_ 20031202  
 Time 22.34  
 INSTRUM drx400  
 PROBD 5 mm Multinuc1  
 PULPROG zgpg30  
 TD 65536  
 SOLVENT CDCl3  
 NS 263  
 DS 2  
 SWH 23148.148 Hz  
 FIDRES 0.353213 Hz  
 AQ 1.4156276 sec  
 RG 32768  
 DM 21.600 usec  
 DE 4.50 usec  
 TE 300.0 K  
 D1 2.00000000 sec  
 d11 0.03000000 sec  
 d12 0.00002000 sec

===== CHANNEL f1 =====  
 NUC1 13C  
 P1 12.30 usec  
 PL1 2.00 dB  
 SF01 100.6232933 MHz

===== CHANNEL f2 =====  
 CPOPRG2 waltz16  
 NUC2 1H  
 PCPD2 100.00 usec  
 PL2 0.00 dB  
 PL12 18.00 dB  
 PL13 18.00 dB  
 SFD2 400.1316005 MHz

F2 - Processing parameters  
 SI 32768  
 SF 100.6127290 MHz  
 WDW EM  
 SSB 0  
 LB 1.00 Hz  
 GB 0  
 PC 1.40

1D NMR plot parameters  
 CX 20.00 cm  
 CY 5.00 cm  
 F1P 215.000 ppm  
 F1 21631.74 Hz  
 F2P -5.000 ppm  
 F2 -503.06 Hz  
 PPMCM 11.00000 ppm/cm  
 HZCM 1106.73999 Hz/cm

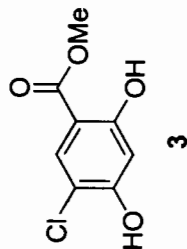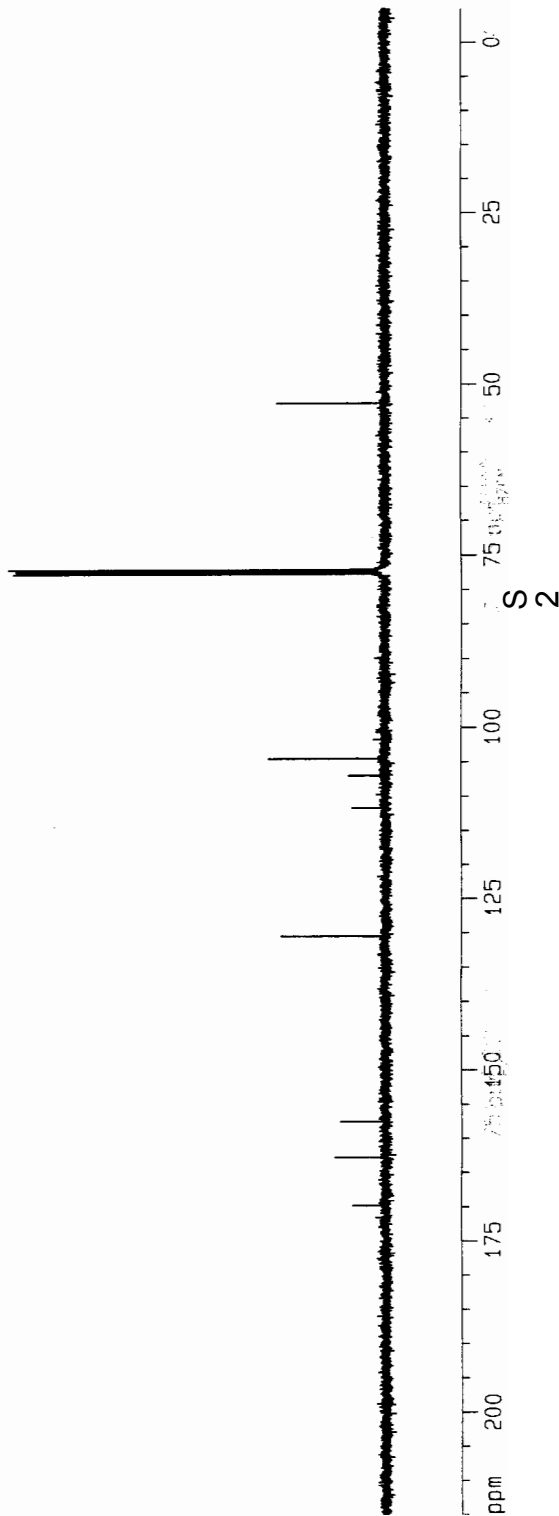

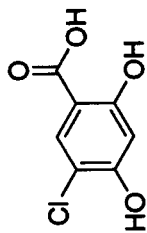

4

Current Data Parameters  
NAME sg229  
EXPNO 2  
PROCNO 1

F2 - Acquisition Parameters

Date\_ 20031202  
Time 23.32  
INSTRUM drx400  
PROBHD 5 mm Multinucl  
PULPROG zg30  
TD 32768  
SOLVENT CDCl3  
NS 16  
DS 2  
SWH 4789.272 Hz  
FIDRES 0.146157 Hz  
AQ 3.4210291 sec  
RG 114  
DW 104.400 usec  
DE 4.50 usec  
TE 300.0 K  
D1 1.00000000 sec

===== CHANNEL f1 =====  
NUC1 1H  
P1 7.70 usec  
PL1 -6.00 dB  
SF01 400.1320007 MHz

F2 - Processing parameters

SI 16384  
SF 400.1300000 MHz  
WDW EM  
SSB 0  
LB 0.30 Hz  
GB 0  
PC 1.00  
  
1D NMR plot parameters  
CX 20.00 cm  
CY 0.50 cm  
F1P 11.000 ppm  
F1 4401.43 Hz  
F2P -1.000 ppm  
F2 -400.13 Hz  
PPMCM 0.60000 ppm/cm  
HZCM 240.07800 Hz/cm

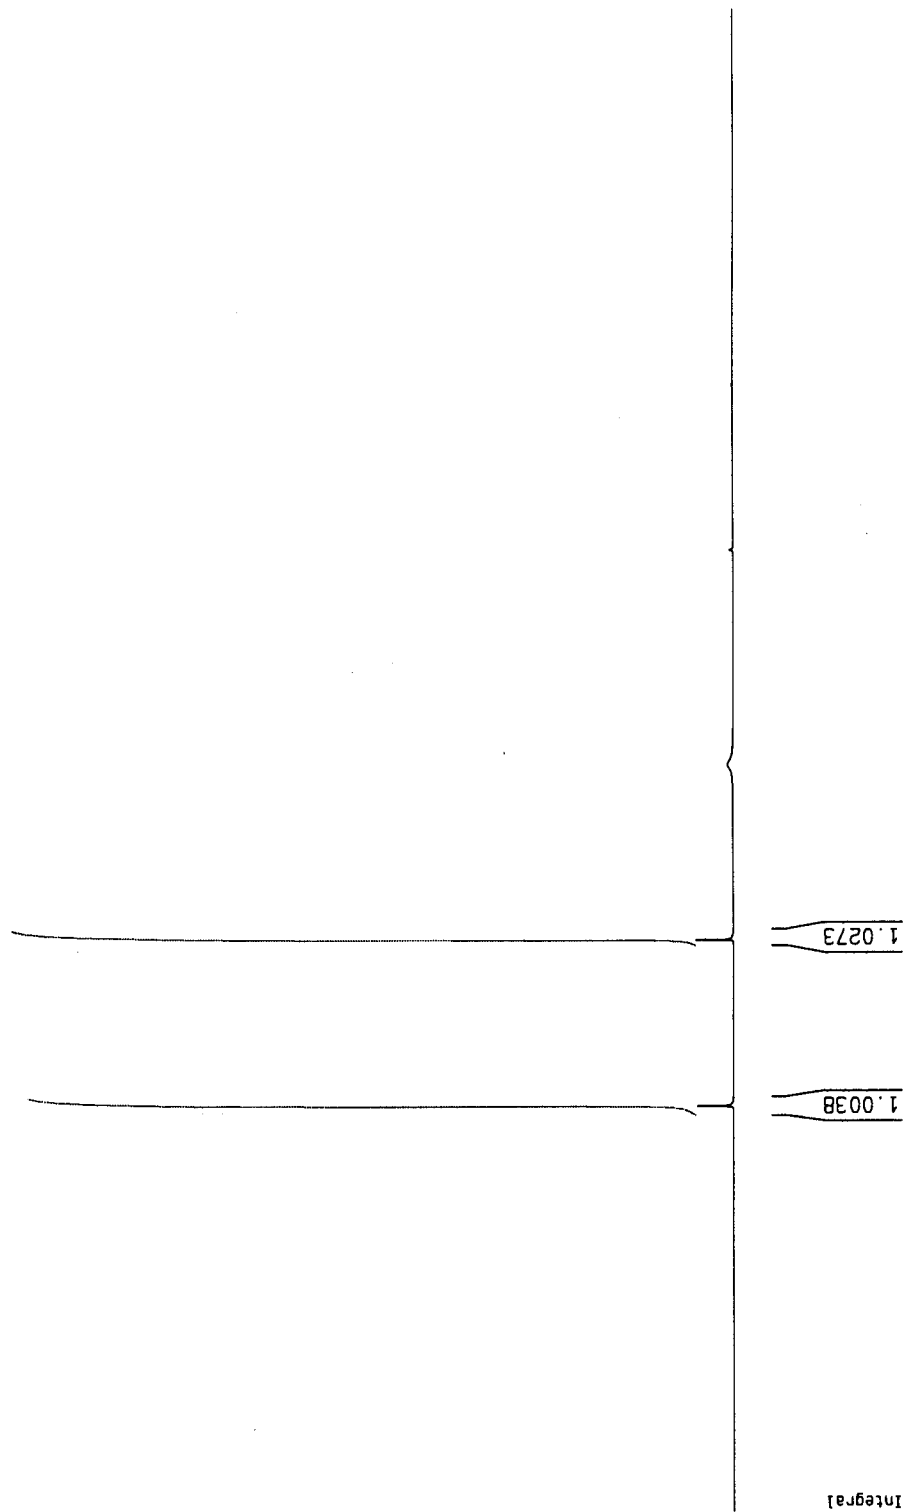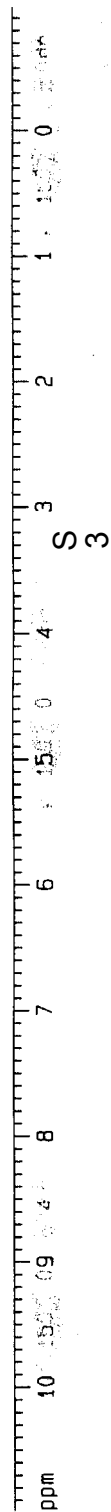

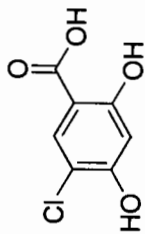

4

Current Data Parameters  
NAME sg228  
EXPNO 2  
PROCNO 1

# F2 - Acquisition Parameters

Date\_ 20031202  
Time 23.30  
INSTRUM drx400  
PROBHD 5 mm Multinuc1  
PULPROG zgpg30  
TD 65536  
SOLVENT MeOH  
NS 93  
DS 2  
SWH 231.48.148 Hz  
FIDRES 0.353213 Hz  
AQ 1.4156276 sec  
RG 812.7  
DM 21.600 usec  
DE 4.50 usec  
TE 300.0 K  
D1 2.00000000 sec  
d11 0.03000000 sec  
d12 0.0002000 sec

===== CHANNEL f1 =====  
NUC1 13C  
P1 12.30 usec  
PL1 2.00 dB  
SF01 100.6232933 MHz

===== CHANNEL f2 =====  
CPDPRG2 waltz16  
NUC2 1H  
PCPD2 100.00 usec  
PL2 0.00 dB  
PL12 18.00 dB  
PL13 18.00 dB  
SF02 400.1316005 MHz

F2 - Processing parameters  
S1 32768  
SF 100.6127290 MHz  
WDW EM  
SSB 0  
LB 1.00 Hz  
GB 0  
PC 1.40

1D NMR plot parameters  
CX 20.00 cm  
CY 12.50 cm  
F1P 215.000 ppm  
F1 21631.74 Hz  
F2P -5.000 ppm  
F2 -503.06 Hz  
PPMCM 11.00000 ppm/cm  
HZCM 1106.73999 Hz/cm

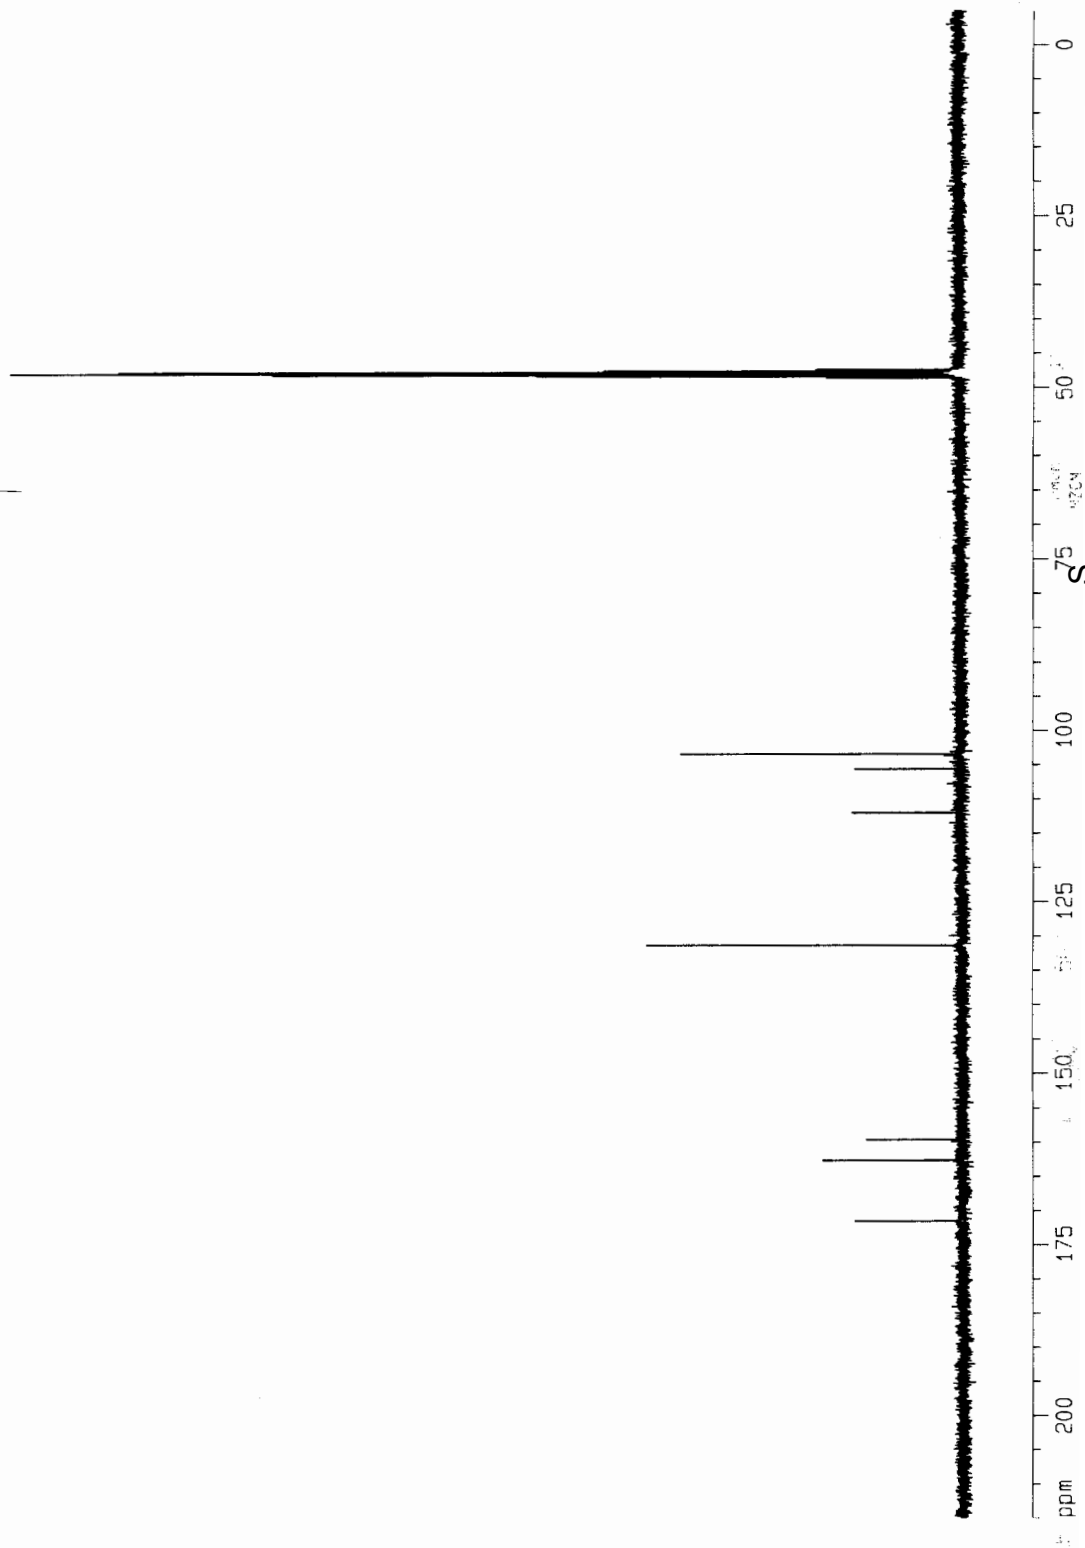

S 4

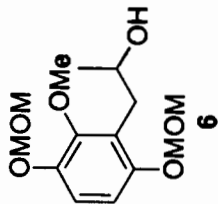

Current Data Parameters  
 NAME sg420  
 EXPNO 1  
 PROCNO 1

F2 - Acquisition Parameters

Date\_ 20050305  
 Time 16.47  
 INSTRUM drx400  
 PROBD 5 mm QNP 1H/13  
 PULPROG zg30  
 TD 32768  
 SOLVENT CDCl3  
 NS 16  
 DS 2  
 SWH 4789.272 Hz  
 FIDRES 0.146157 Hz  
 AQ 3.4210291 sec  
 RG 64  
 DW 104.400 usec  
 DE 5.50 usec  
 TE 293.2 K  
 D1 1.00000000 sec  
 MCREST 0.00000000 sec  
 MCWRK 0.01500000 sec

===== CHANNEL f1 =====

NUC1 1H  
 P1 9.35 usec  
 PL1 -4.00 dB  
 SF01 400.1320007 MHz

F2 - Processing parameters

SI 32768  
 SF 400.1300000 MHz  
 WDW EM  
 SSB 0  
 LB 0.30 Hz  
 GB 0  
 PC 1.00

1D NMR plot parameters

CX 20.00 cm  
 CY 5.00 cm  
 F1P 11.000 ppm  
 F1 4401.43 Hz  
 F2P -1.000 ppm  
 F2 -400.13 Hz  
 PPMCM 0.60000 ppm/cm  
 HZCM 240.07800 Hz/cm

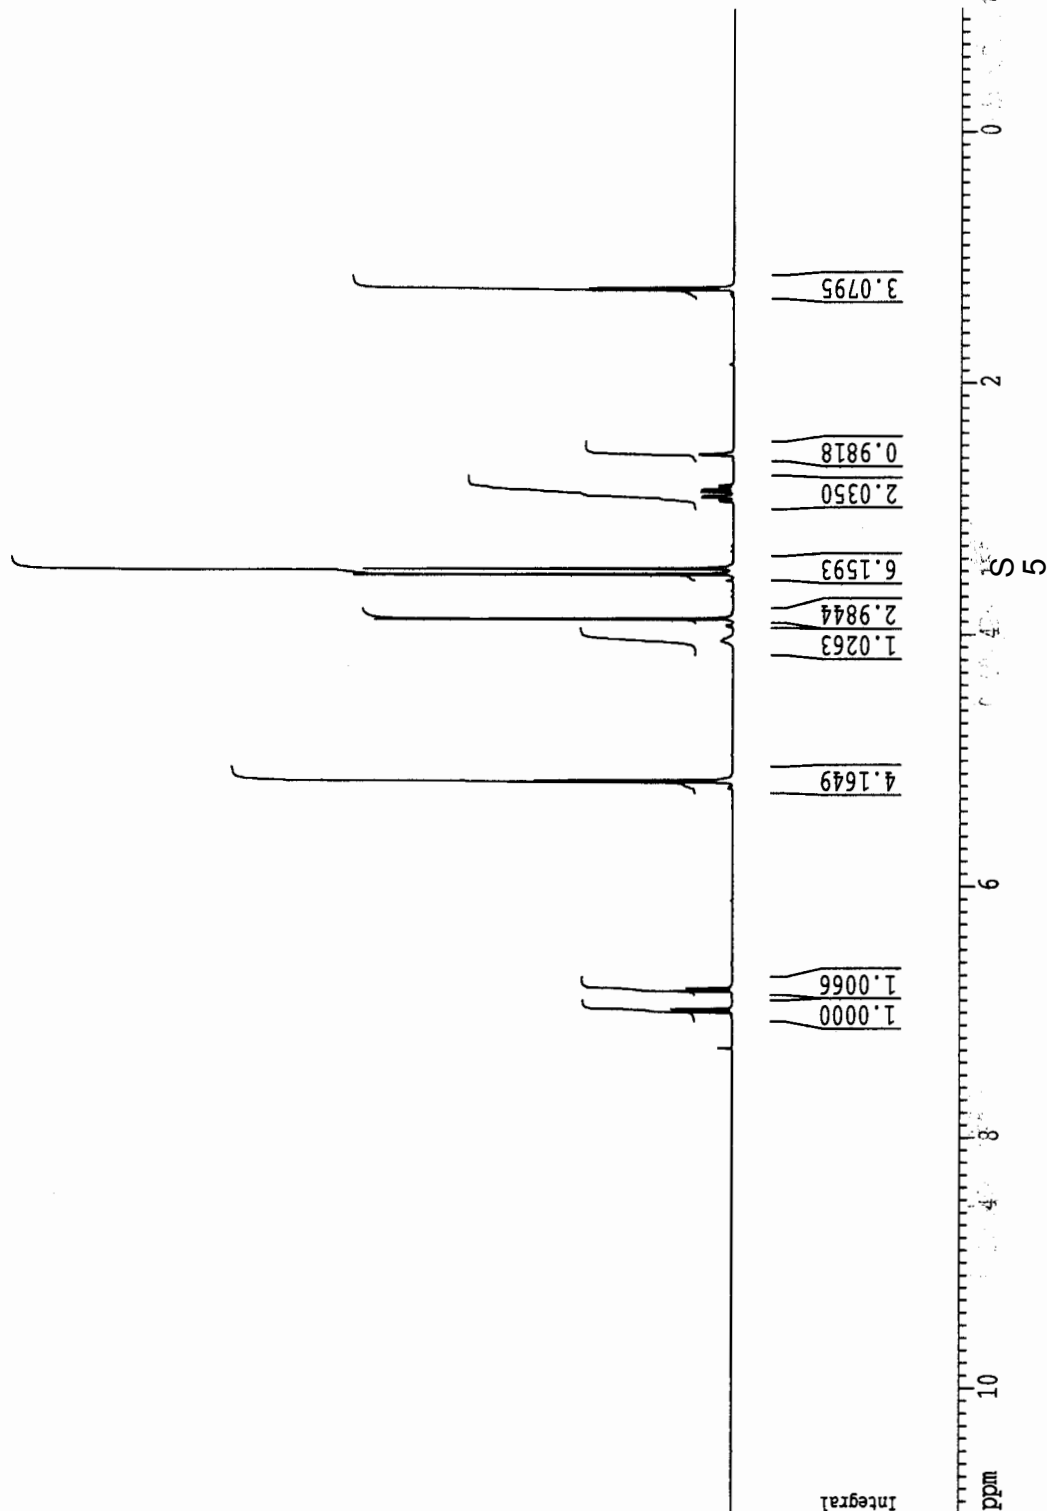

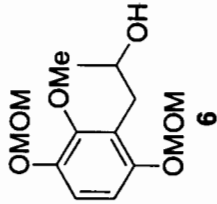

Current Data Parameters  
NAME sg420  
EXPNO 2  
PROCNO 1

F2 - Acquisition Parameters  
Date\_ 20050305  
Time 16:51  
INSTRUM drx400  
PROBHD 5 mm QNP 1H/13  
PULPROG zgpg30  
TD 65536  
SOLVENT CDCl3  
NS 170  
DS 4  
SWH 23148.148 Hz  
FIDRES 0.353213 Hz  
AQ 1.4156276 sec  
RG 32768  
DW 21.600 usec  
DE 5.50 usec  
TE 293.2 K  
D1 0.15000001 sec  
d11 0.03000000 sec  
DELTA 0.05000000 sec  
MCREST 0.00000000 sec  
MCWRK 0.01500000 sec

===== CHANNEL f1 =====  
NUC1 13C  
P1 11.25 usec  
PL1 2.00 dB  
SFO1 100.6232933 MHz

===== CHANNEL f2 =====  
CPDPRG2 waltz16  
NUC2 1H  
PCPD2 100.00 usec  
PL2 -4.00 dB  
PL12 16.58 dB  
PL13 17.00 dB  
SFO2 400.1316005 MHz

F2 - Processing parameters  
SI 65536  
SF 100.6127290 MHz  
WDW EM  
SSB 0  
LB 1.00 Hz  
GB 0  
PC 1.40

1D NMR plot parameters  
CX 20.00 cm  
CY 3.00 cm  
FIP 215.000 ppm  
F1 21631.74 Hz  
F2P -5.000 ppm  
F2 -503.06 Hz  
P1MCM 11.00000 ppm/cm  
P2MCM 1106.73999 Hz/cm

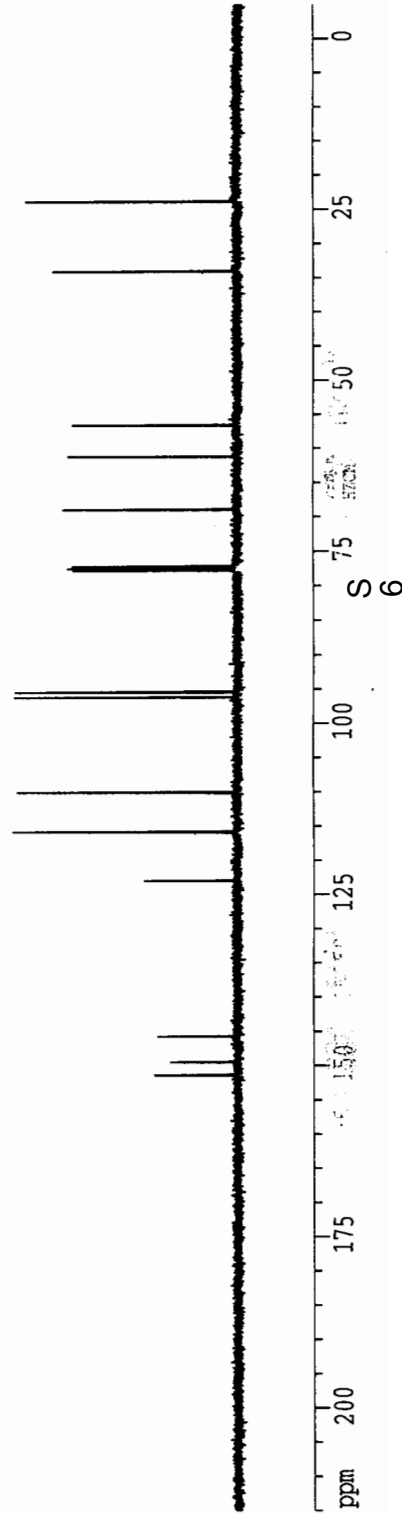

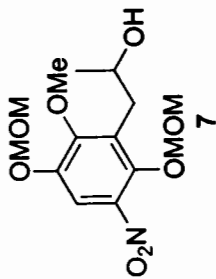

Current Data Parameters  
 NAME sg421  
 EXPNO 1  
 PROCNO 1

F2 - Acquisition Parameters

Date\_ 20050305  
 Time 18.14  
 INSTRUM drx400  
 PROBHD 5 mm QNP 1H/13  
 PULPROG zg30  
 TD 32768  
 SOLVENT CDCl3  
 NS 16  
 DS 2  
 SWH 4789.272 Hz  
 FIDRES 0.146157 Hz  
 AQ 3.4210291 sec  
 RG 101.6  
 DW 104.400 usec  
 DE 5.50 usec  
 TE 293.2 K  
 D1 1.00000000 sec  
 MCREST 0.00000000 sec  
 MCWPK 0.01500000 sec

===== CHANNEL f1 =====  
 NUC1 1H  
 P1 9.35 usec  
 PL1 -4.00 dB  
 SFO1 400.1320007 MHz

F2 - Processing parameters

SI 32768  
 SF 400.1300000 MHz  
 WDW EM  
 SSB 0  
 LB 0.30 Hz  
 GB 0  
 PC 1.00

1D NMR plot parameters

CX 20.00 cm  
 CY 3.00 cm  
 F1P 11.000 ppm  
 F1 4401.43 Hz  
 F2P -1.000 ppm  
 F2 -400.13 Hz  
 PPMCM 0.60000 ppm/cm  
 HZCM 240.07800 Hz/cm

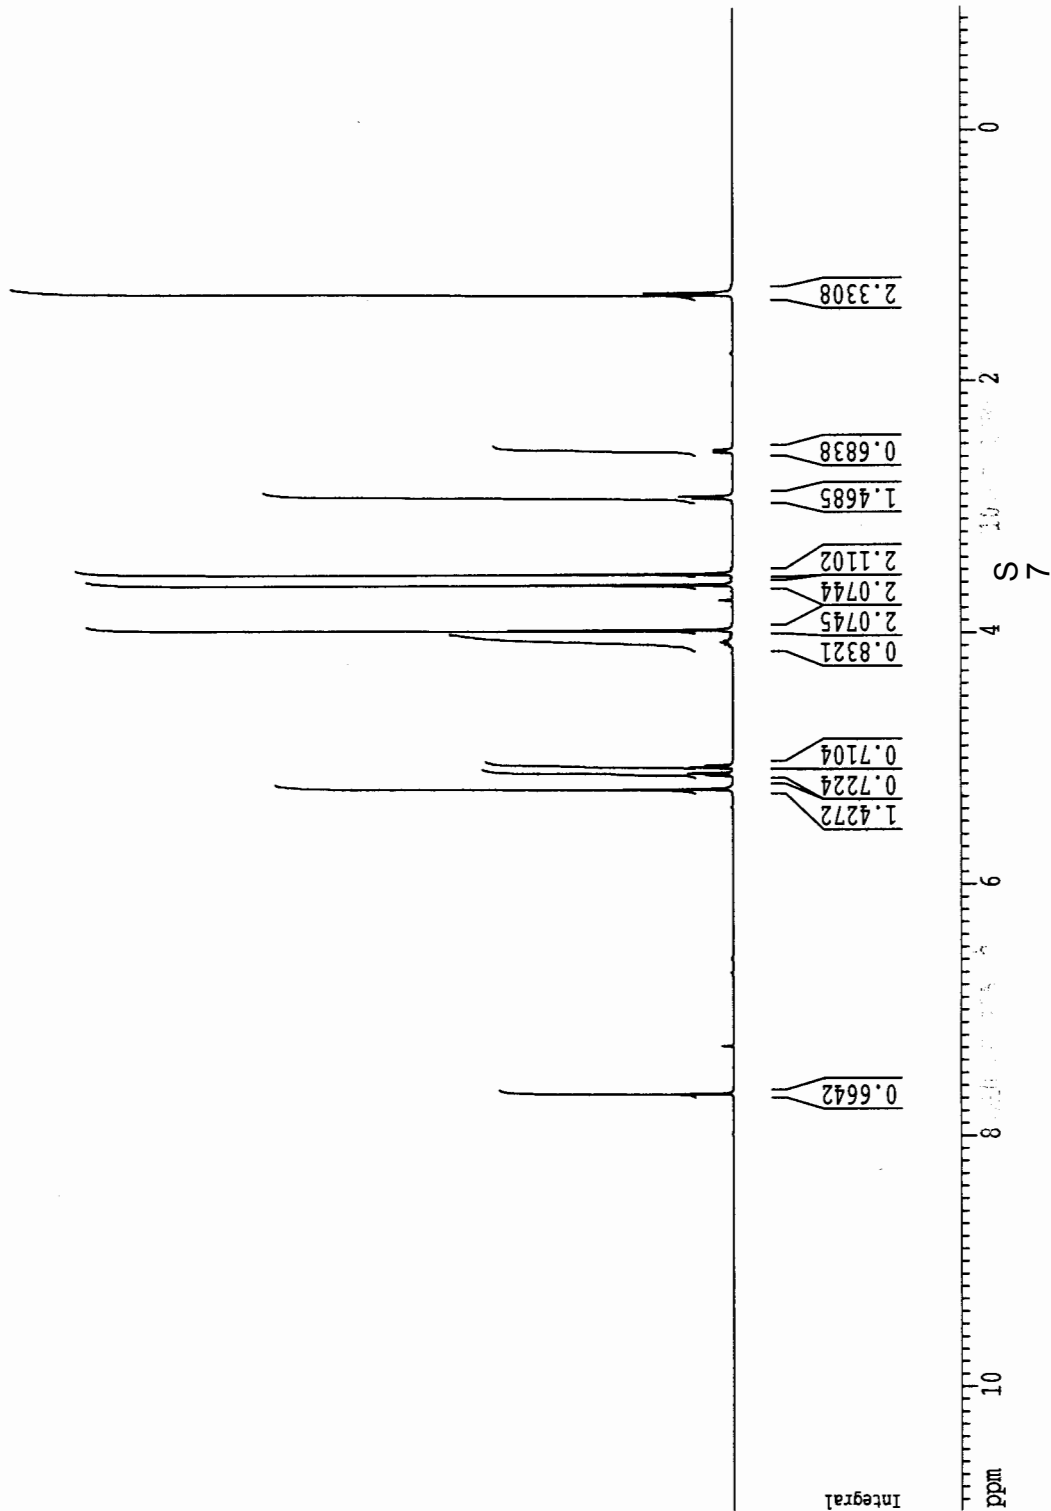



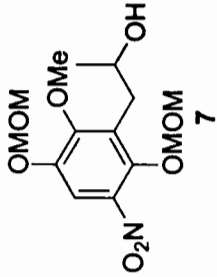

Current Data Parameters  
NAME S9421  
EXPNO 2  
PROCNO 1

F2 - Acquisition Parameters  
Date\_ 20050305  
Time 18.16  
INSTRUM drx400  
PROBHD 5 mm QNP 1H/13  
PULPROG zgpg30  
TD 65536  
SOLVENT CDCl3  
NS 144  
DS 4  
SWH 23148.148 Hz  
FIDRES 0.353213 Hz  
AQ 1.4156276 sec  
RG 32768  
DW 21.600 usec  
DE 5.50 usec  
TE 293.2 K  
D1 0.15000001 sec  
d11 0.03000000 sec  
DELTA 0.05000000 sec  
MCREST 0.00000000 sec  
MCWRR 0.01500000 sec

===== CHANNEL f1 =====  
NUC1 13C  
P1 11.25 usec  
PL1 2.00 dB  
SFO1 100.6232933 MHz

===== CHANNEL f2 =====  
CPDPRG2 waltz16  
NUC2 1H  
PCPD2 100.00 usec  
PL2 -4.00 dB  
PL12 16.58 dB  
PL13 17.00 dB  
SFO2 400.1316005 MHz

F2 - Processing parameters  
SI 65536  
SF 100.6127290 MHz  
WDW EM  
SSB 0  
LB 1.00 Hz  
GB 0  
PC 1.40

1D NMR plot parameters  
CX 20.00 cm  
CY 2.00 cm  
F1P 215.000 ppm  
F1 21631.74 Hz  
F2P -5.000 ppm  
F2 -503.06 Hz  
PPMCM 11.00000 ppm/cm  
HZCM 1106.73999 Hz/cm

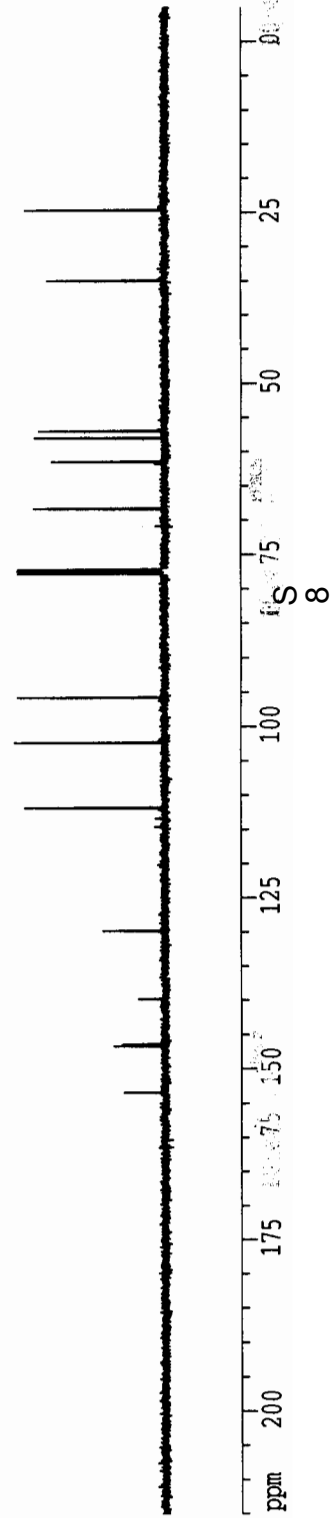

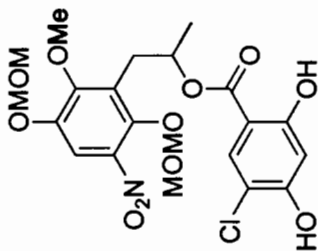

8

Current Data Parameters  
NAME gs-572  
EXPNO 1  
PROCNO 1

# F2 - Acquisition Parameters

Date\_ 20050307  
Time 9.50  
INSTRUM drx400  
PROBHD 5 mm QNP 1H/13  
PULPROG zg30  
TD 32768  
SOLVENT CDCl3  
NS 16  
DS 2  
SWH 4789.272 Hz  
FIDRES 0.146157 Hz  
AQ 3.4210291 sec  
RG 406.4  
DW 104.400 usec  
DE 5.50 usec  
TE 293.2 K  
D1 1.00000000 sec  
MCREST 0.00000000 sec  
MCWRK 0.01500000 sec

===== CHANNEL f1 =====  
NUC1 1H  
P1 9.35 usec  
PL1 -4.00 dB  
SFO1 400.1320007 MHz

# F2 - Processing parameters

SI 32768  
SF 400.1300000 MHz  
WDW EM  
SSB 0  
LB 0.30 Hz  
GB 0  
PC 1.00

# 1D NMR plot parameters

CX 20.00 cm  
CY 7.00 cm  
F1P 11.000 ppm  
F1 4401.43 Hz  
F2P -1.000 ppm  
F2 -400.13 Hz  
PPMCM 0.60000 ppm/cm  
HZCM 240.07800 Hz/cm

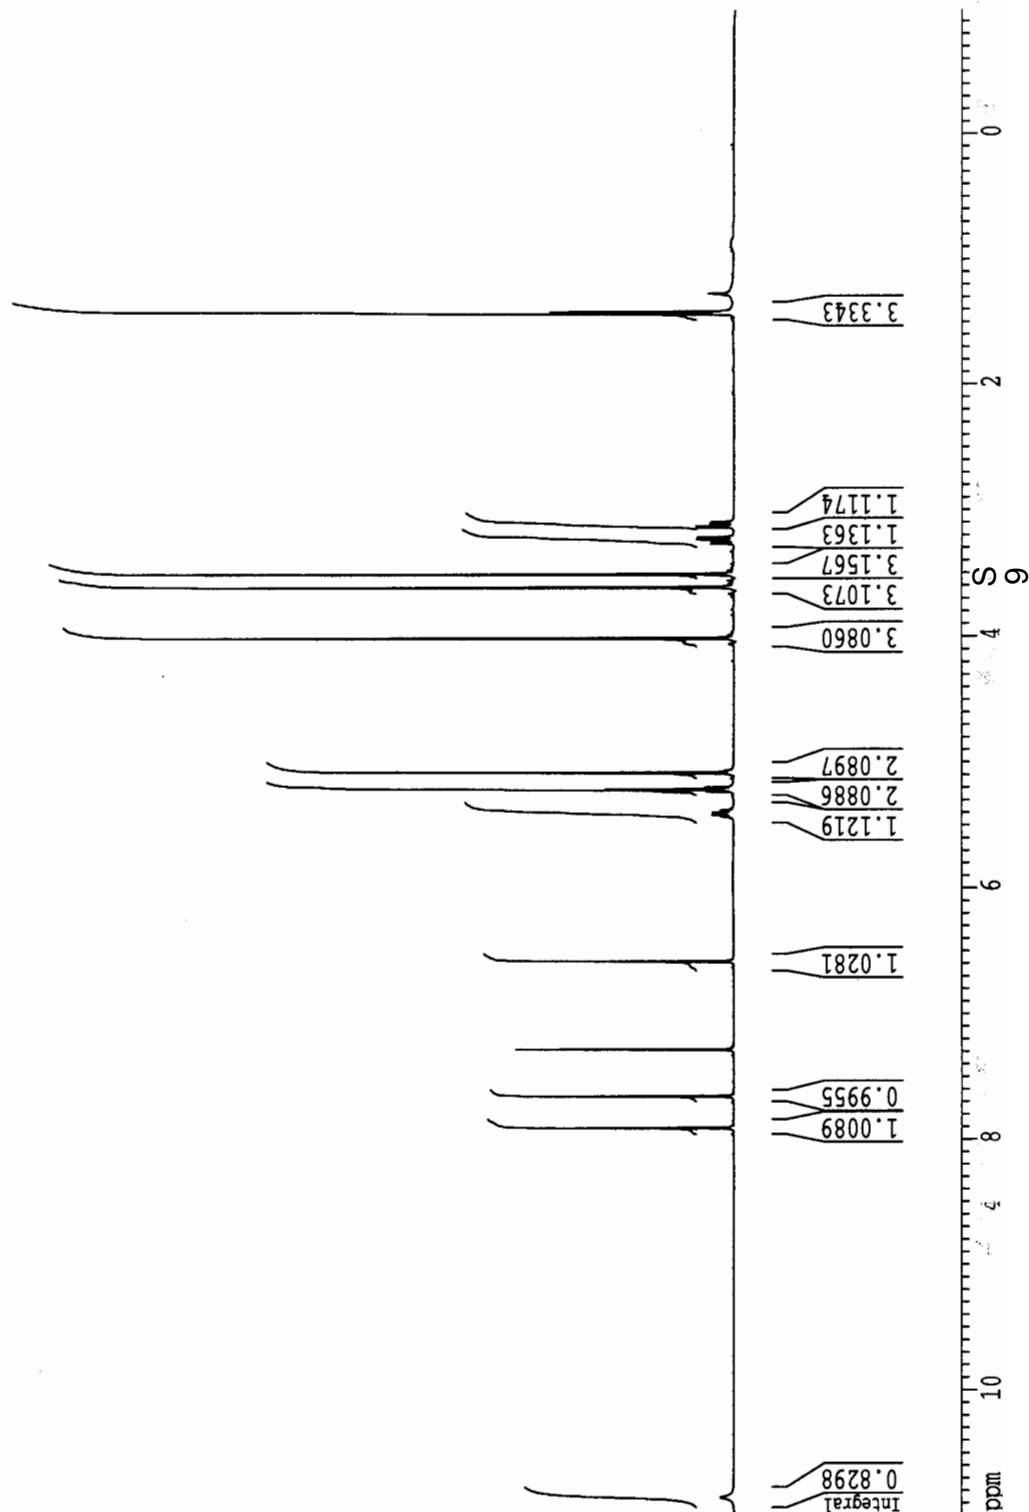

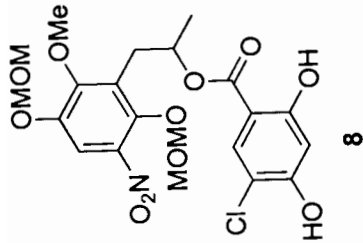

Current Data Parameters  
 NAME gs-572  
 EXPNO 3  
 PROCNO 1

# F2 - Acquisition Parameters

Date\_ 20050307  
 Time 12.53  
 INSTRUM dirx400  
 PROBHD 5 mm QNP 1H/13  
 PULPROG zgpg30  
 TD 65536  
 SOLVENT CDCl3  
 NS 1928  
 DS 4  
 SWH 23148.148 Hz  
 FIDRES 0.353213 Hz  
 AQ 1.4156276 sec  
 RG 32768  
 DW 21.600 usec  
 DE 5.50 usec  
 TE 293.2 K  
 D1 0.15000001 sec  
 d11 0.03000000 sec  
 DELTA 0.05000000 sec  
 MCREST 0.00000000 sec  
 MCWRK 0.01500000 sec

===== CHANNEL f1 =====  
 NUC1 13C  
 P1 11.25 usec  
 PL1 2.00 dB  
 SF01 100.6232933 MHz

===== CHANNEL f2 =====  
 CPDPRG2 waltz16  
 NUC2 1H  
 FCPD2 100.00 usec  
 PL2 -4.00 dB  
 PL12 16.58 dB  
 PL13 17.00 dB  
 SF02 400.1316005 MHz

F2 - Processing parameters  
 SI 65536  
 SF 100.6127290 MHz  
 WDW EM  
 SSB 0  
 LB 1.00 Hz  
 GB 0  
 PC 1.40

1D NMR plot parameters  
 CX 20.00 cm  
 CY 20.00 cm  
 FIP 215.000 ppm  
 F1 21631.74 Hz  
 F2 -5.000 ppm  
 F2 -503.06 Hz  
 PPMCM 11.00000 ppm/cm  
 HZCM 1106.73999 Hz/cm

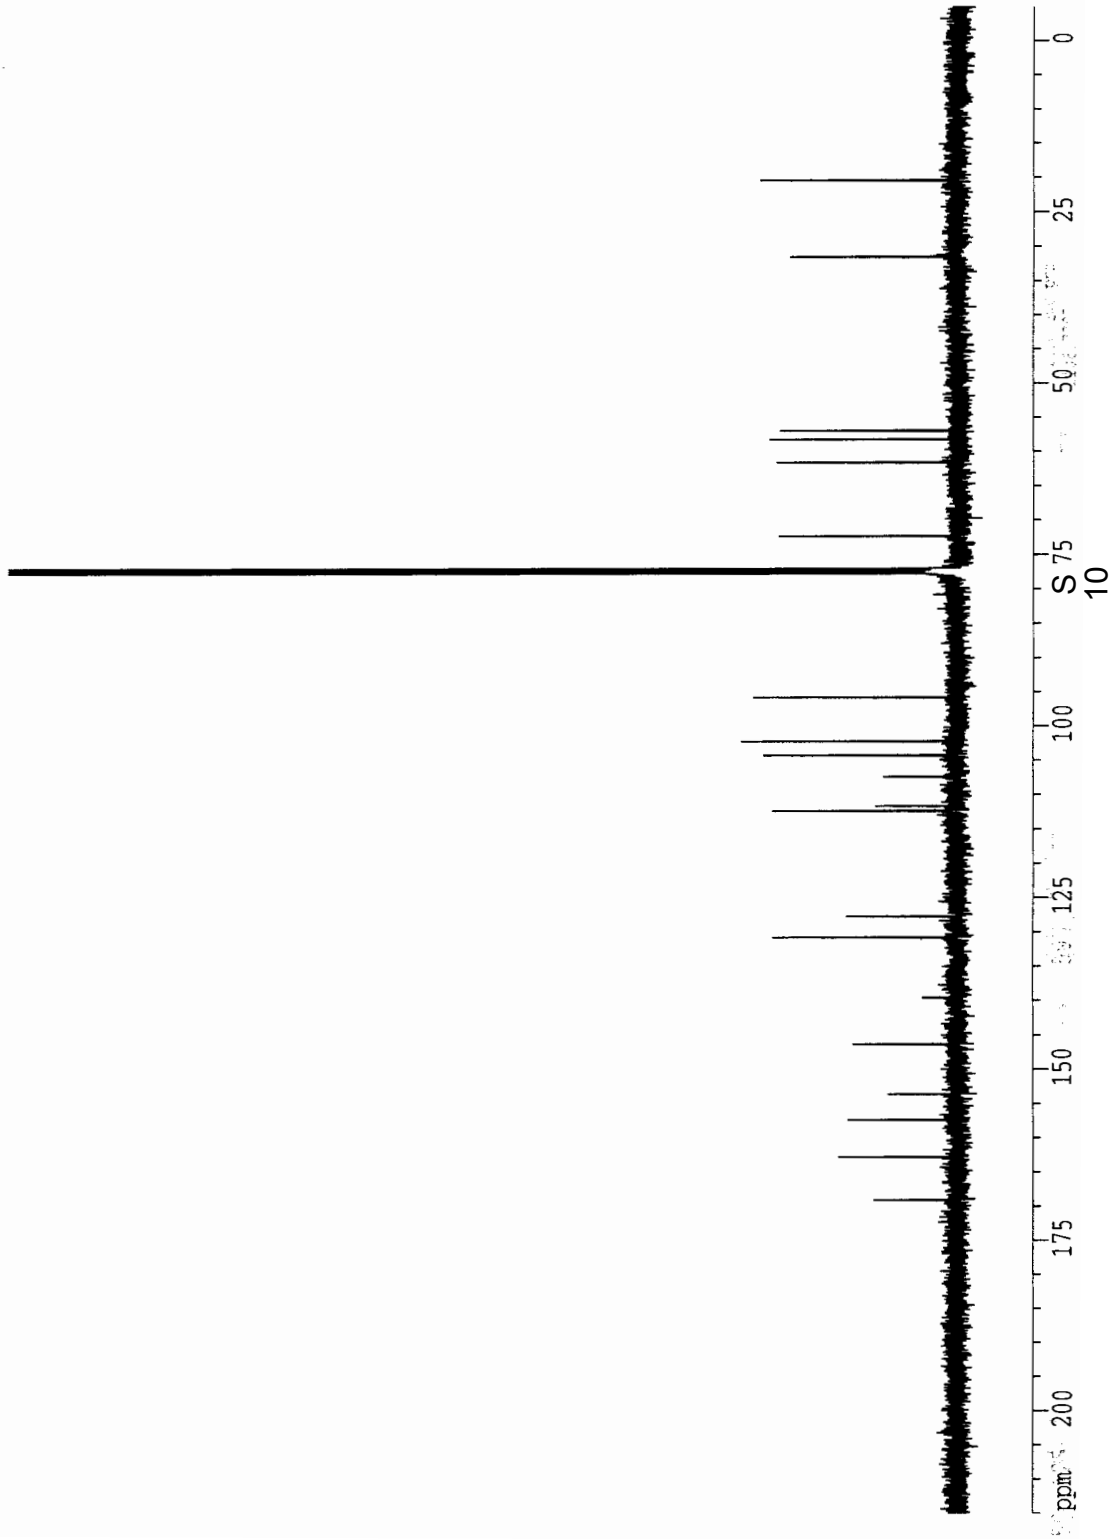

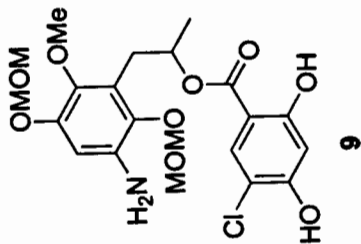

Current Data Parameters  
 NAME sg-162  
 EXPNO 2  
 PROCNO 1

F2 - Acquisition Parameters  
 Date\_ 20031007  
 Time 16.48  
 INSTRUM drx400  
 PROBHD 5 mm Multinucl  
 PULPROG zg30  
 TD 32768  
 SOLVENT CDC13  
 NS 16  
 DS 2  
 SWH 4789.272 Hz  
 FIDRES 0.146157 Hz  
 AQ 3.4210291 sec  
 RG 101.6  
 DW 104.400 usec  
 DE 4.50 usec  
 TE 300.0 K  
 D1 1.00000000 sec

===== CHANNEL f1 =====  
 NUC1 1H  
 P1 7.70 usec  
 PL1 -6.00 dB  
 SF01 400.1320007 MHz

F2 - Processing parameters  
 SI 16384  
 SF 400.1300000 MHz  
 WDW EM  
 SSB 0  
 LB 0.30 Hz  
 GB 0  
 PC 1.00  
 1D NMR plot parameters  
 CX 20.00 cm  
 CY 5.00 cm  
 F1P 11.000 ppm  
 F1 4401.43 Hz  
 F2P -1.000 ppm  
 F2 -400.13 Hz  
 PPMCM 0.60000 ppm/cm  
 HZCM 240.07800 Hz/cm

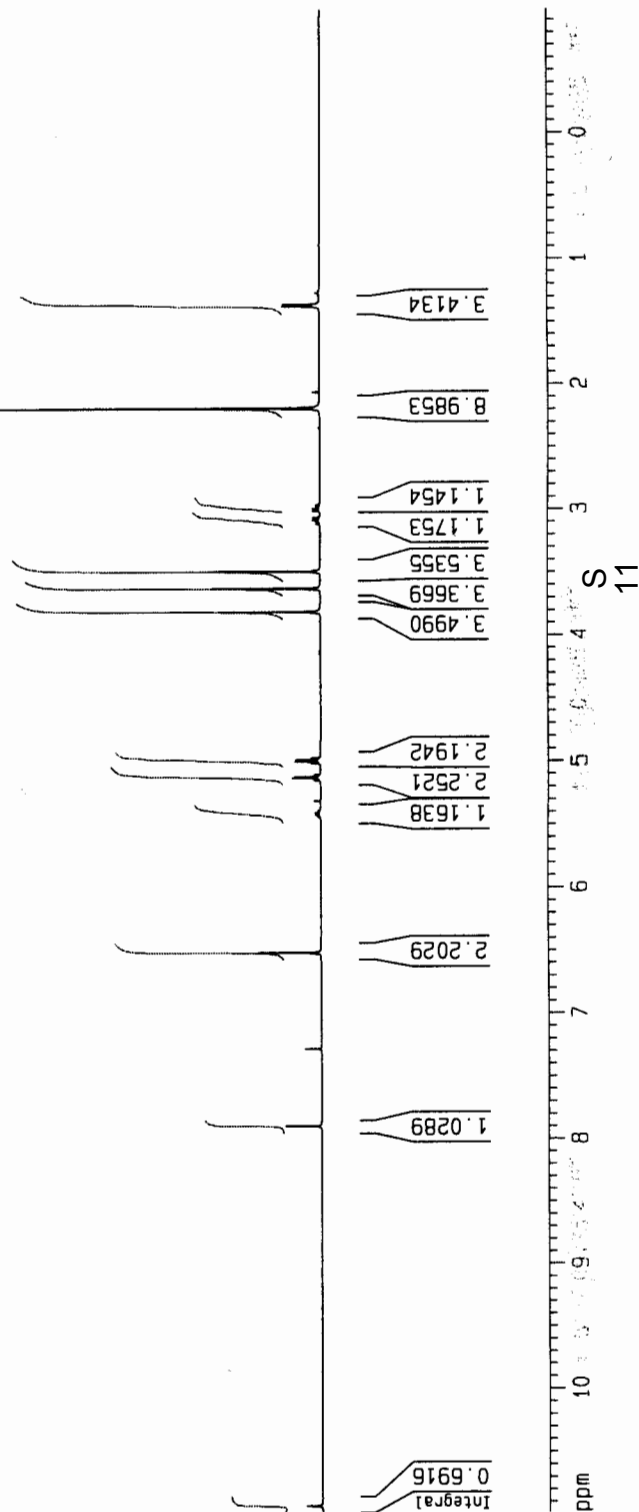

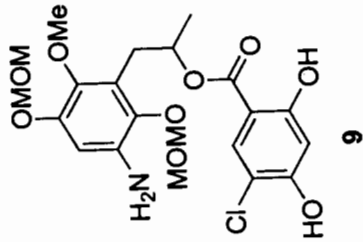

Current Data Parameters  
 NAME sg-163  
 EXPNO 2  
 PROCNO 1

F2 - Acquisition Parameters

Date\_ 20031007  
 Time 16.54  
 INSTRUM drx400  
 PROBHD 5 mm Multinucl  
 PULPROG zgpg30  
 TO 65536  
 SOLVENT CDCl3  
 NS 404  
 DS 2  
 SWH 23148.148 Hz  
 FIDRES 0.353213 Hz  
 AQ 1.4156276 sec  
 RG 1149.4  
 OW 21.600 usec  
 DE 4.50 usec  
 TE 300.0 K  
 D1 0.05000000 sec  
 d11 0.03000000 sec  
 d12 0.00002000 sec

===== CHANNEL f1 =====

NUC1 13C  
 P1 12.30 usec  
 PL1 2.00 dB  
 SF01 100.6232933 MHz

===== CHANNEL f2 =====

CPDPRG2 waltz16  
 NUC2 1H  
 PCPD2 100.00 usec  
 PL2 0.00 dB  
 PL12 18.00 dB  
 PL13 18.00 dB  
 SF02 400.1316005 MHz

F2 - Processing parameters

SI 32768  
 SF 100.6127290 MHz  
 WDW EM  
 SSB 0  
 LB 1.00 Hz  
 GB 0  
 PC 1.40

1D NMR plot parameters

CX 19.55 cm  
 CY 3.00 cm  
 F1P 205.000 ppm  
 F1 20625.61 Hz  
 F2P -10.036 ppm  
 F2 -1009.74 Hz  
 PPMCM 11.00000 ppm/cm  
 HZCM 1106.73999 Hz/cm

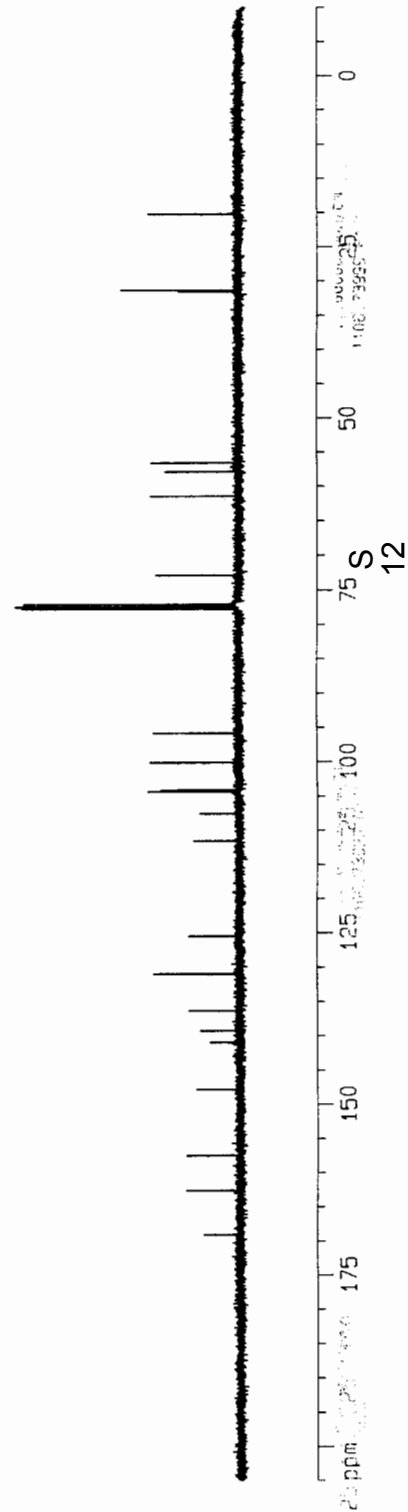

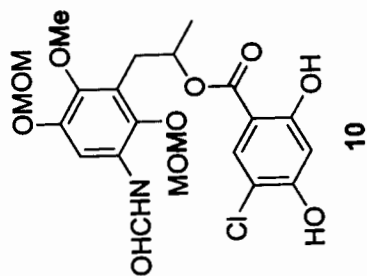

Current Data Parameters  
NAME sg423  
EXPNO 1  
PROCNO 1

F2 - Acquisition Parameters

Date\_ 20050310  
Time 12.34  
INSTRUM drx400  
PROBHD 5 mm QNP 1H/13  
PULPROG zg30  
TD 32768  
SOLVENT CDCl3  
NS 16  
DS 2  
SWH 4789.272 Hz  
FIDRES 0.146157 Hz  
AQ 3.4210291 sec  
RG 512  
DM 104.400 usec  
DE 5.50 usec  
TE 293.2 K  
D1 1.0000000 sec  
MCREST 0.0000000 sec  
MCWPK 0.0150000 sec

===== CHANNEL f1 =====  
NUC1 1H  
P1 9.35 usec  
PL1 -4.00 dB  
SFO1 400.1320007 MHz

F2 - Processing parameters

SI 32768  
SF 400.1300000 MHz  
WDW EM  
SSB 0  
LB 0.30 Hz  
GB 0  
PC 1.00  
1D NMR plot parameters  
CX 20.00 cm  
CY 10.00 cm  
F1P 11.000 ppm  
F1 4401.43 Hz  
F2P -1.000 ppm  
F2 -400.13 Hz  
PPMCM 0.60000 ppm/cm  
HZCM 240.07800 Hz/cm

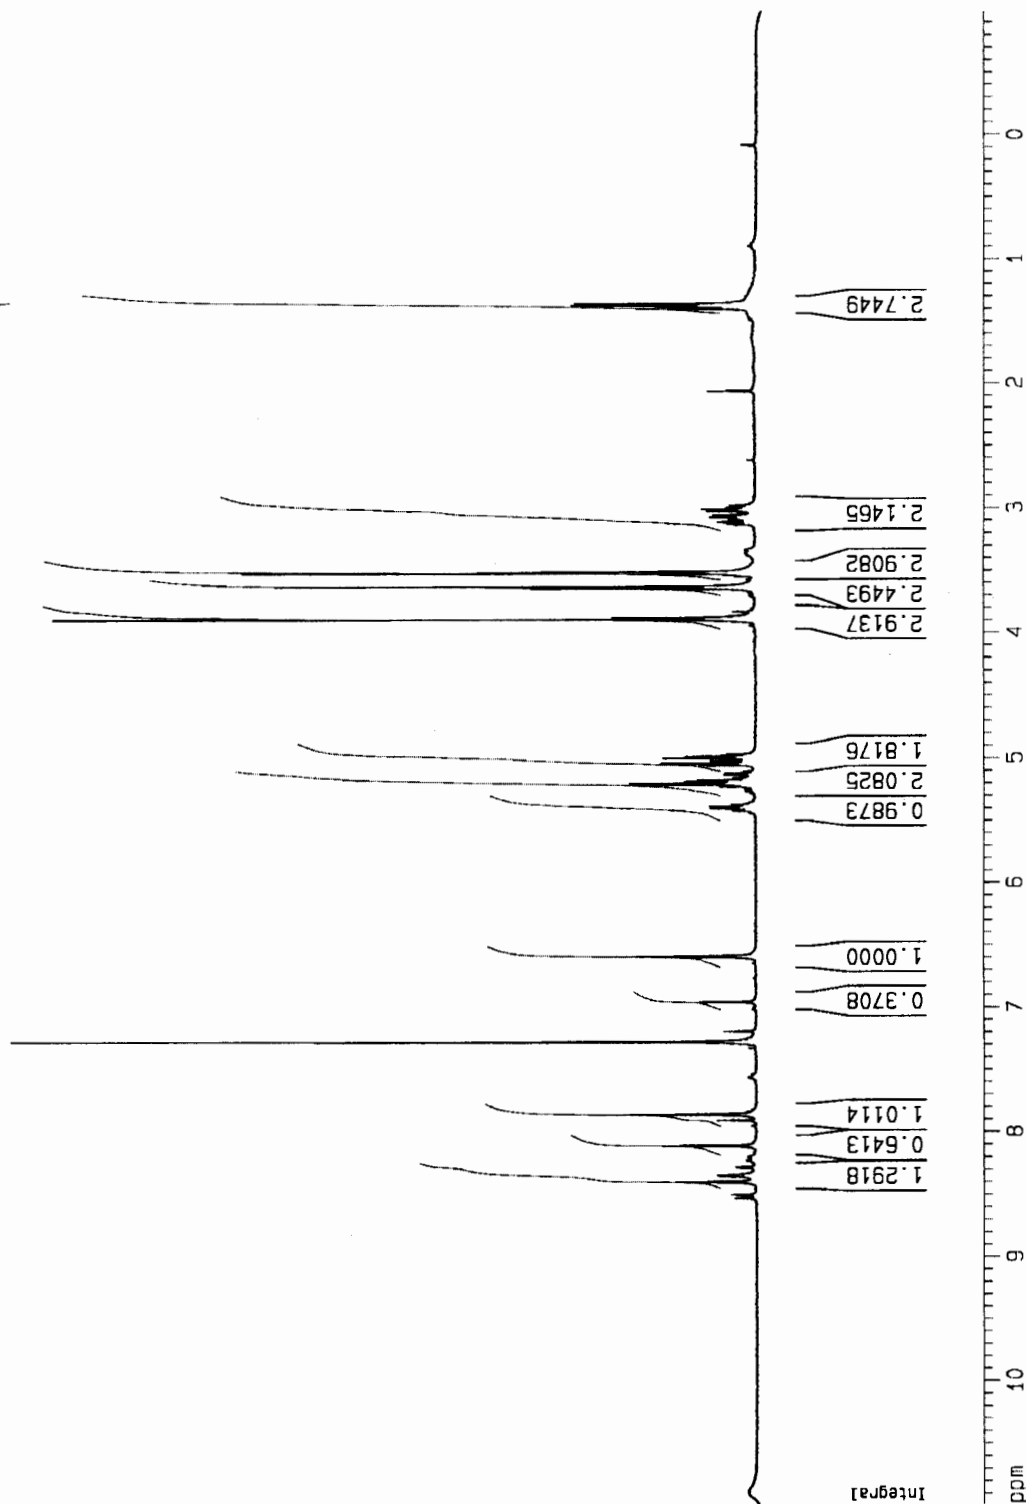

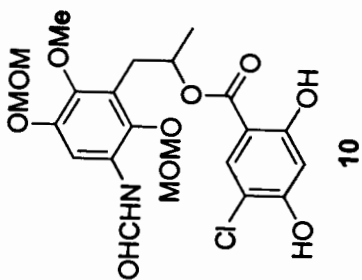

Current Data Parameters  
 NAME sg-166  
 EXPNO 2  
 PROCNO 1

F2 - Acquisition Parameters  
 Date\_ 20031010  
 Time 8.27  
 INSTRUM drx400  
 PROBD 5 mm Multinucl  
 PULPROG zgpg30  
 TD 65536  
 SOLVENT CDCl3  
 NS 459  
 DS 2  
 SWH 23148.148 Hz  
 FIDRES 0.353213 Hz  
 AQC 1.4156276 sec  
 RG 114  
 DW 21.600 usec  
 DE 4.50 usec  
 TE 300.0 K  
 D1 0.05000000 sec  
 d11 0.03000000 sec  
 d12 0.00002000 sec

===== CHANNEL f1 =====  
 NUC1 13C  
 P1 12.30 usec  
 PL1 2.00 dB  
 SF01 100.6232933 MHz

===== CHANNEL f2 =====  
 CPDPRG2 waltz16  
 NUC2 1H  
 PCPD2 100.00 usec  
 PL2 0.00 dB  
 PL12 18.00 dB  
 PL13 18.00 dB  
 SF02 400.1316005 MHz

F2 - Processing parameters  
 SI 32768  
 SF 100.6127290 MHz  
 WDW EM  
 SSB 0  
 LB 1.00 Hz  
 GB 0  
 PC 1.40

1D NMR plot parameters  
 CX 20.00 cm  
 CY 12.50 cm  
 FIP 215.000 ppm  
 F1 21631.74 Hz  
 F2P -5.000 ppm  
 F2 -503.06 Hz  
 PPMCM 11.00000 ppm/cm  
 HZCM 1106.73999 Hz/cm

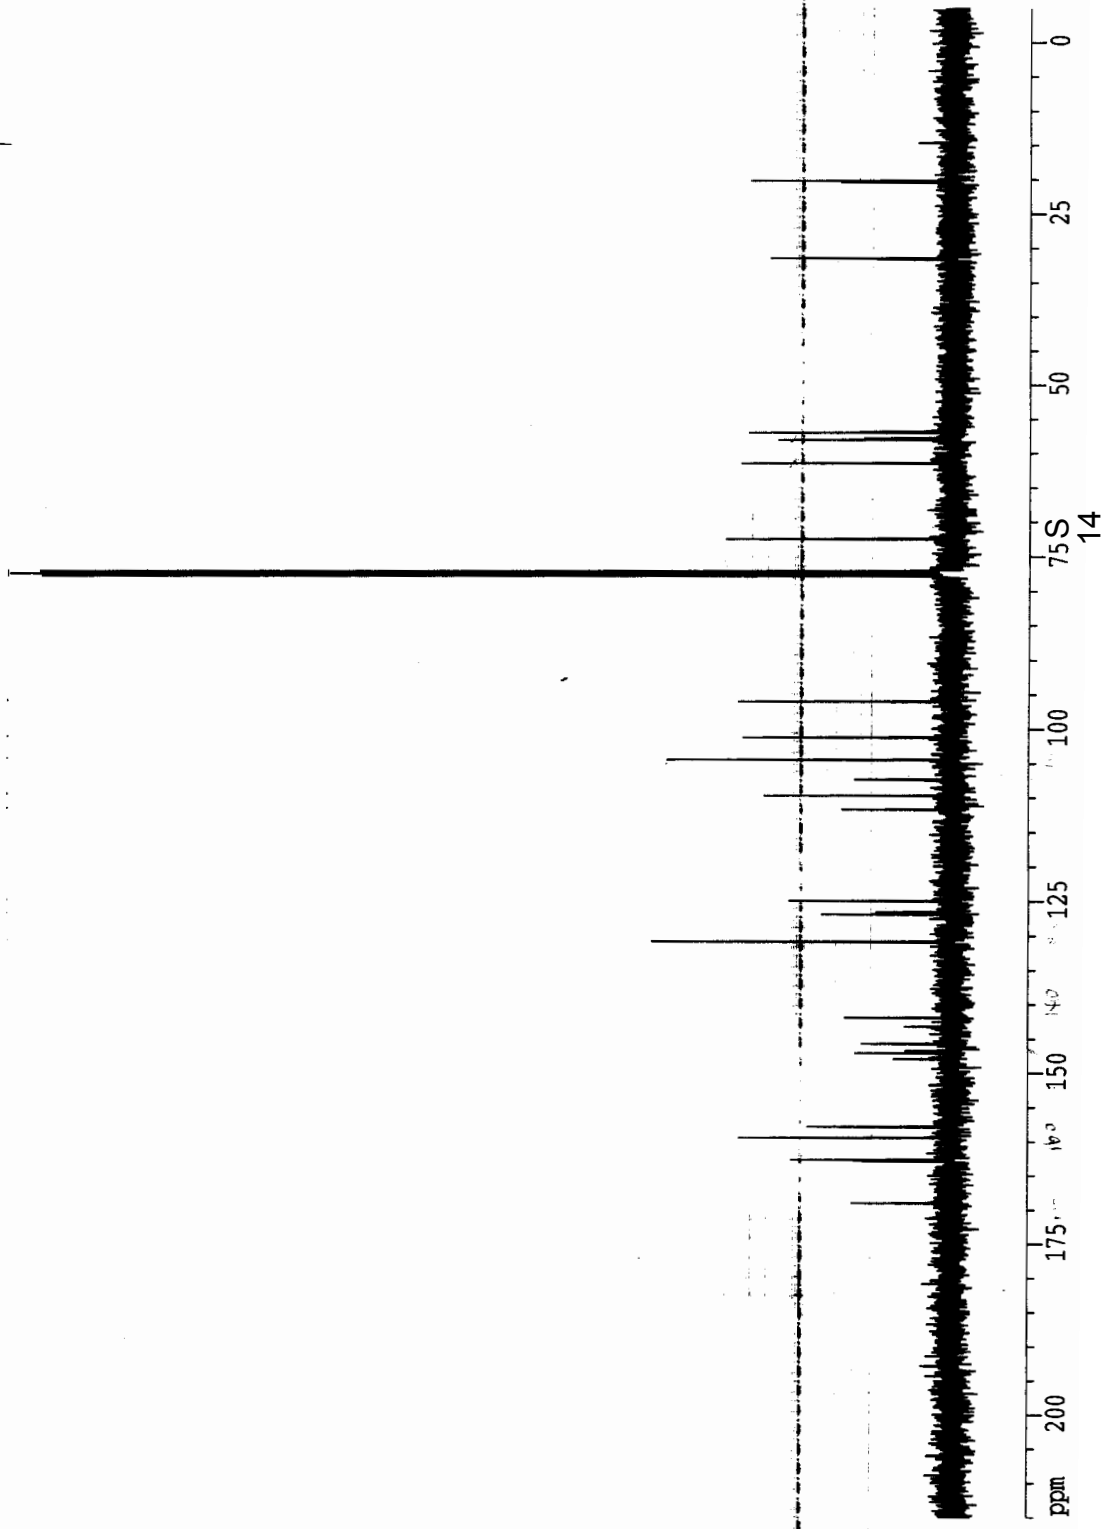

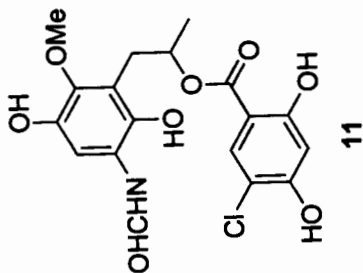

Current Data Parameters  
 NAME gs-574 isopro hydro  
 EXPNO 1  
 PROCNO 1

F2 - Acquisition Parameters

Date\_ 20050308  
 Time 9.43  
 INSTRUM drx400  
 PROBHD 5 mm QNP 1H/13  
 PULPROG zg30  
 TD 32768  
 SOLVENT CDC13  
 NS 16  
 DS 2  
 SWH 4789.272 Hz  
 FIDRES 0.146157 Hz  
 AQ 3.4210291 sec  
 RG 512  
 DM 104.400 usec  
 DE 5.50 usec  
 TE 292.2 K  
 D1 1.00000000 sec  
 MCREST 0.00000000 sec  
 MCRRK 0.01500000 sec

===== CHANNEL f1 =====  
 NUC1 1H  
 P1 9.35 usec  
 PL1 -4.00 dB  
 SF01 400.1320007 MHz

F2 - Processing parameters  
 SI 32768  
 SF 400.1300000 MHz  
 WDW EM  
 SSB 0  
 LB 0.30 Hz  
 GB 0  
 PC 1.00

1D NMR plot parameters  
 CX 20.00 cm  
 CY 12.00 cm  
 F1P 11.000 ppm  
 F1 4401.43 Hz  
 F2P -1.000 ppm  
 F2 -400.13 Hz  
 PPMCM 0.60000 ppm/cm  
 HZCM 240.07800 Hz/cm

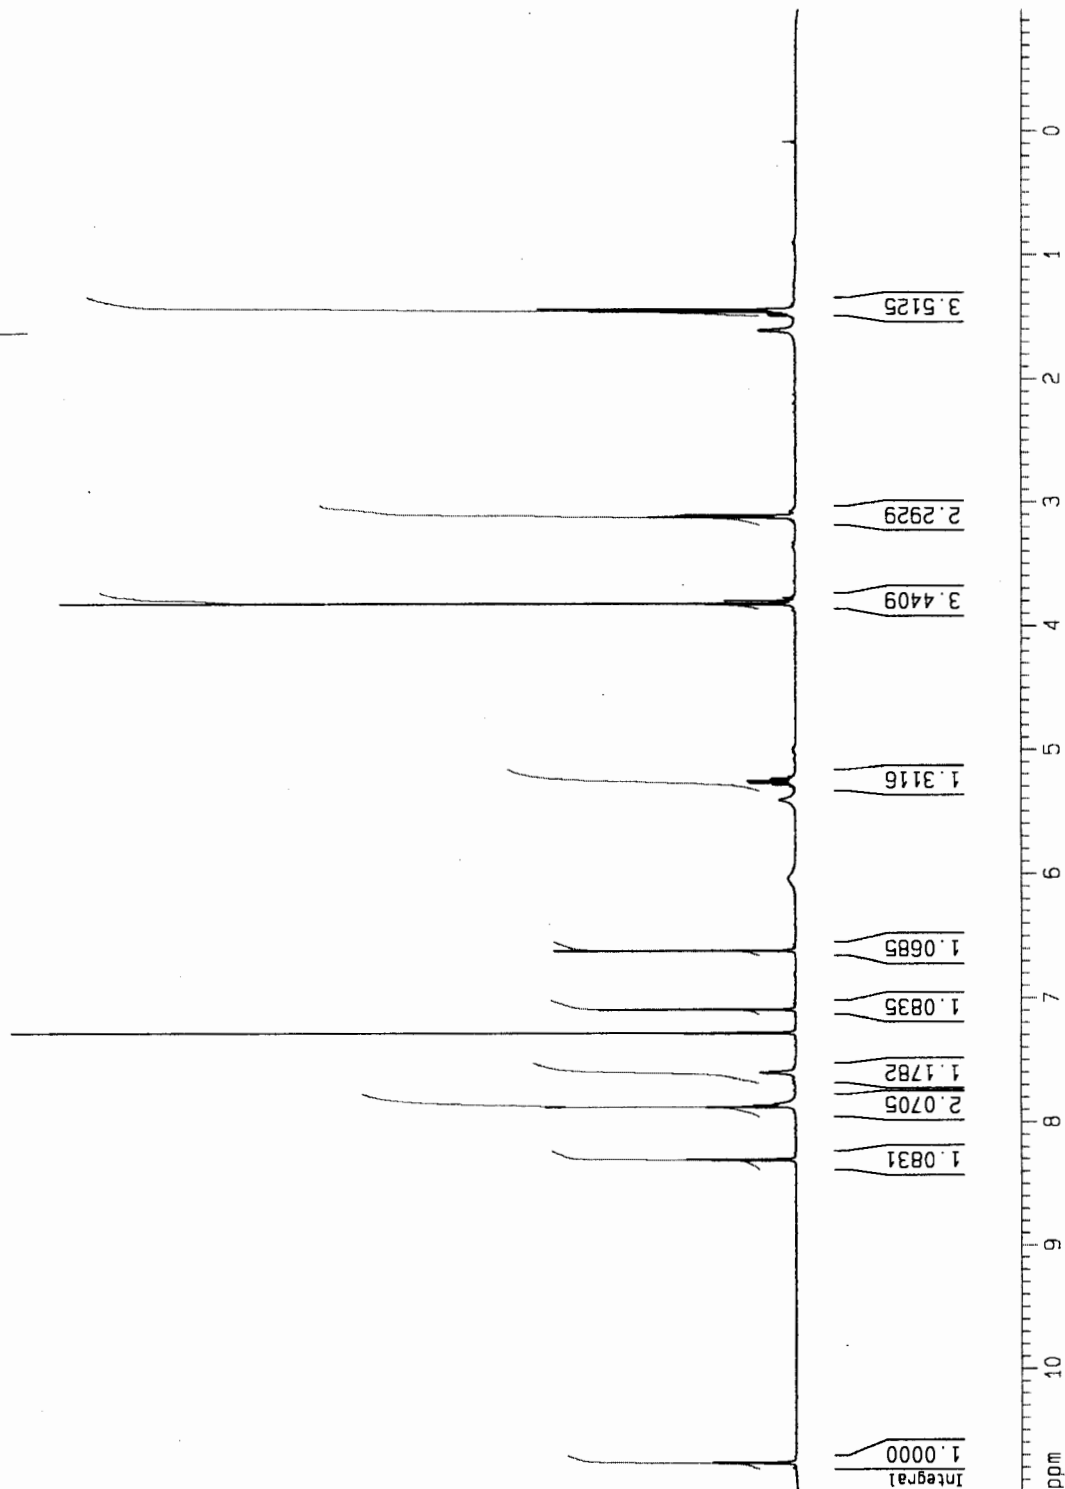



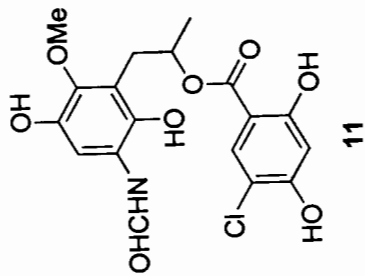

Current Data Parameters  
NAME sg422  
EXPNO 2  
PROCNO 1

F2 - Acquisition Parameters

Date\_ 20050308  
Time 22.07  
INSTRUM dr400  
PROBHD 5 mm QNP 1H/13  
PULPROG zgpg30  
TD 65536  
SOLVENT CDCl3  
NS 28670  
DS 4  
SWH 23148.148 Hz  
FIDRES 0.353213 Hz  
AQ 1.4156276 sec  
RG 32768  
OM 21.600 usec  
DE 5.50 usec  
TE 293.2 K  
D1 0.15000001 sec  
d11 0.03000000 sec  
DELTA 0.05000000 sec  
MCREST 0.00000000 sec  
MCMRK 0.01500000 sec

===== CHANNEL f1 =====  
NUC1 13C  
P1 11.25 usec  
PL1 2.00 dB  
SF01 100.6232933 MHz

===== CHANNEL f2 =====  
CPDPRG2 waltz16  
NUC2 1H  
PCPD2 100.00 usec  
PL2 -4.00 dB  
PL12 16.58 dB  
PL13 17.00 dB  
SF02 400.1316005 MHz

F2 - Processing parameters

SI 65536  
SF 100.6127290 MHz  
WDW EM  
SSB 0  
LB 1.00 Hz  
GB 0  
PC 1.40

1D NMR plot parameters

CX 20.00 cm  
CY 20.00 cm  
F1P 215.000 ppm  
F1 21631.74 Hz  
F2P -5.000 ppm  
F2 -503.06 Hz  
PPMCM 11.00000 ppm/cm  
HZCM 1105.73999 Hz/cm

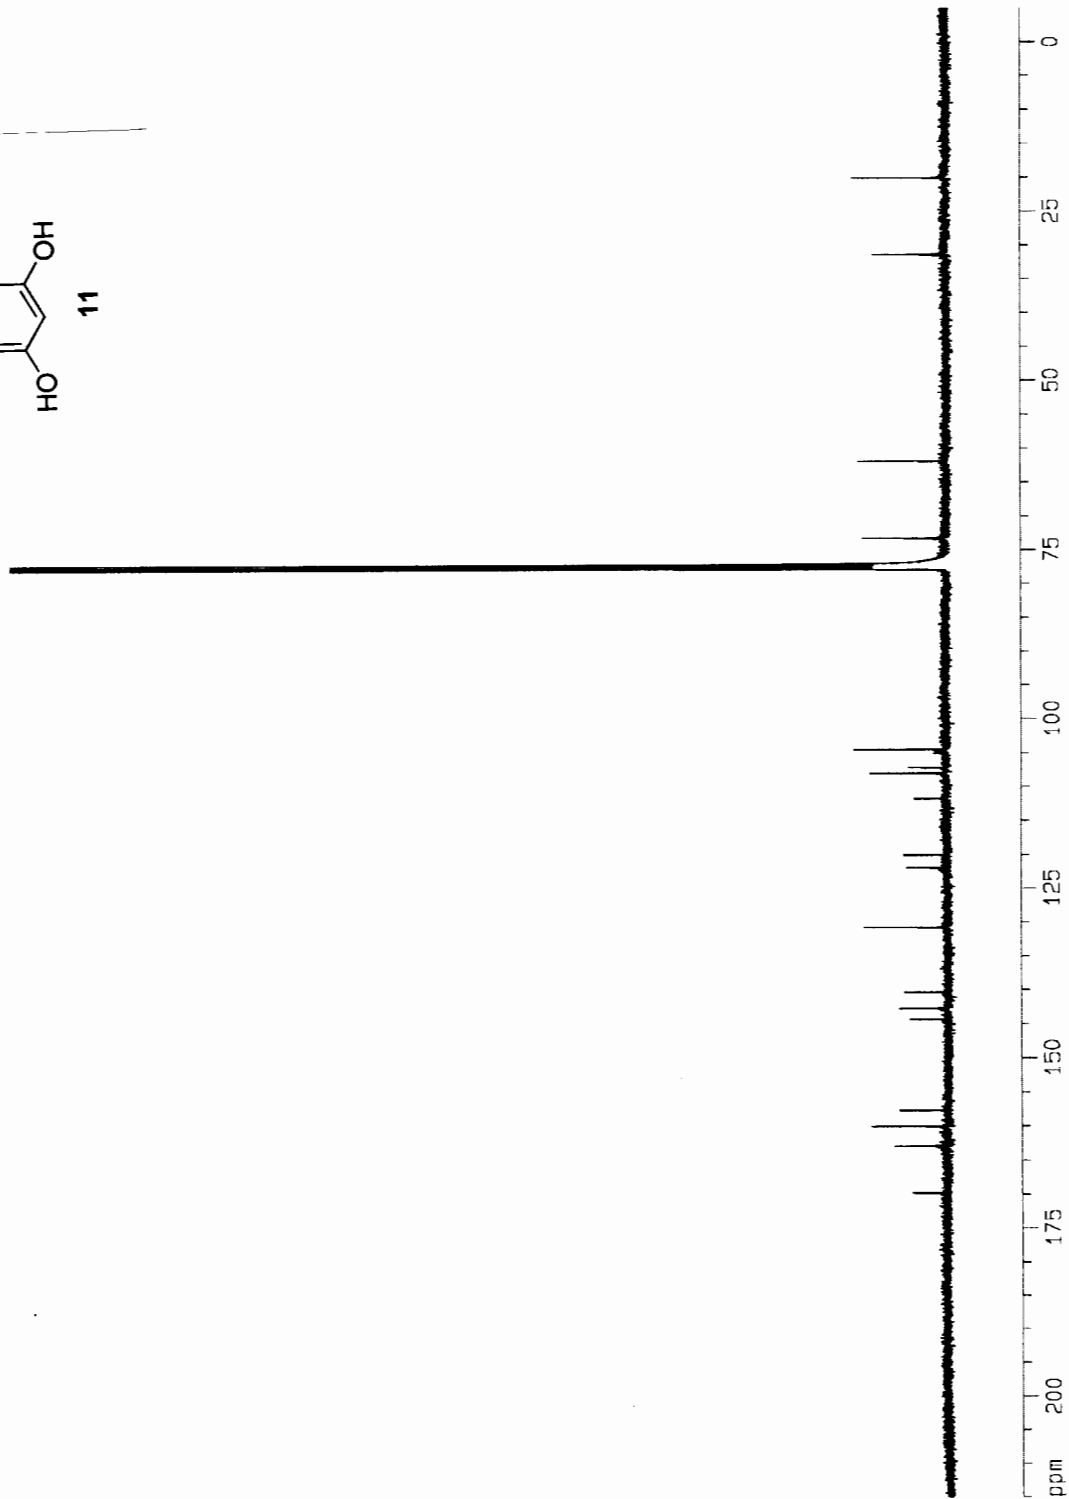

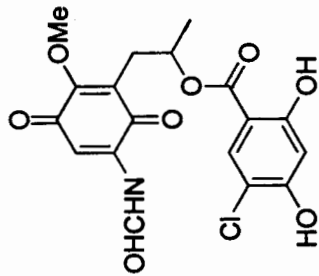

# Current Data Parameters

NAME sg-172  
EXPNO 2  
PROCNO 1

## F2 - Acquisition Parameters

Date\_ 20031019  
Time 17.41  
INSTRUM drx400  
PROBHD 5 mm Multinucl  
PULPROG zg30  
TD 32768  
SOLVENT CDCl3  
NS 16  
DS 2  
SWH 4789.272 Hz  
FIDRES 0.146157 Hz  
AQ 3.4210291 sec  
RG 181  
DM 104.400 usec  
DE 4.50 usec  
TE 300.0 K  
D1 1.00000000 sec

## ===== CHANNEL f1 =====

NUC1 1H  
P1 7.70 usec  
PL1 -6.00 dB  
SF01 400.1320007 MHz

## F2 - Processing parameters

SI 16384  
SF 400.1300000 MHz  
WDW EM  
SSB 0  
LB 0.30 Hz  
GB 0  
PC 1.00  
1D NMR plot parameters  
CX 20.00 cm  
CY 10.00 cm  
F1P 11.000 ppm  
F1 4401.43 Hz  
F2P -1.000 ppm  
F2 -400.13 Hz  
PPMCH 0.60000 ppm/cm  
HZCM 240.07800 Hz/cm

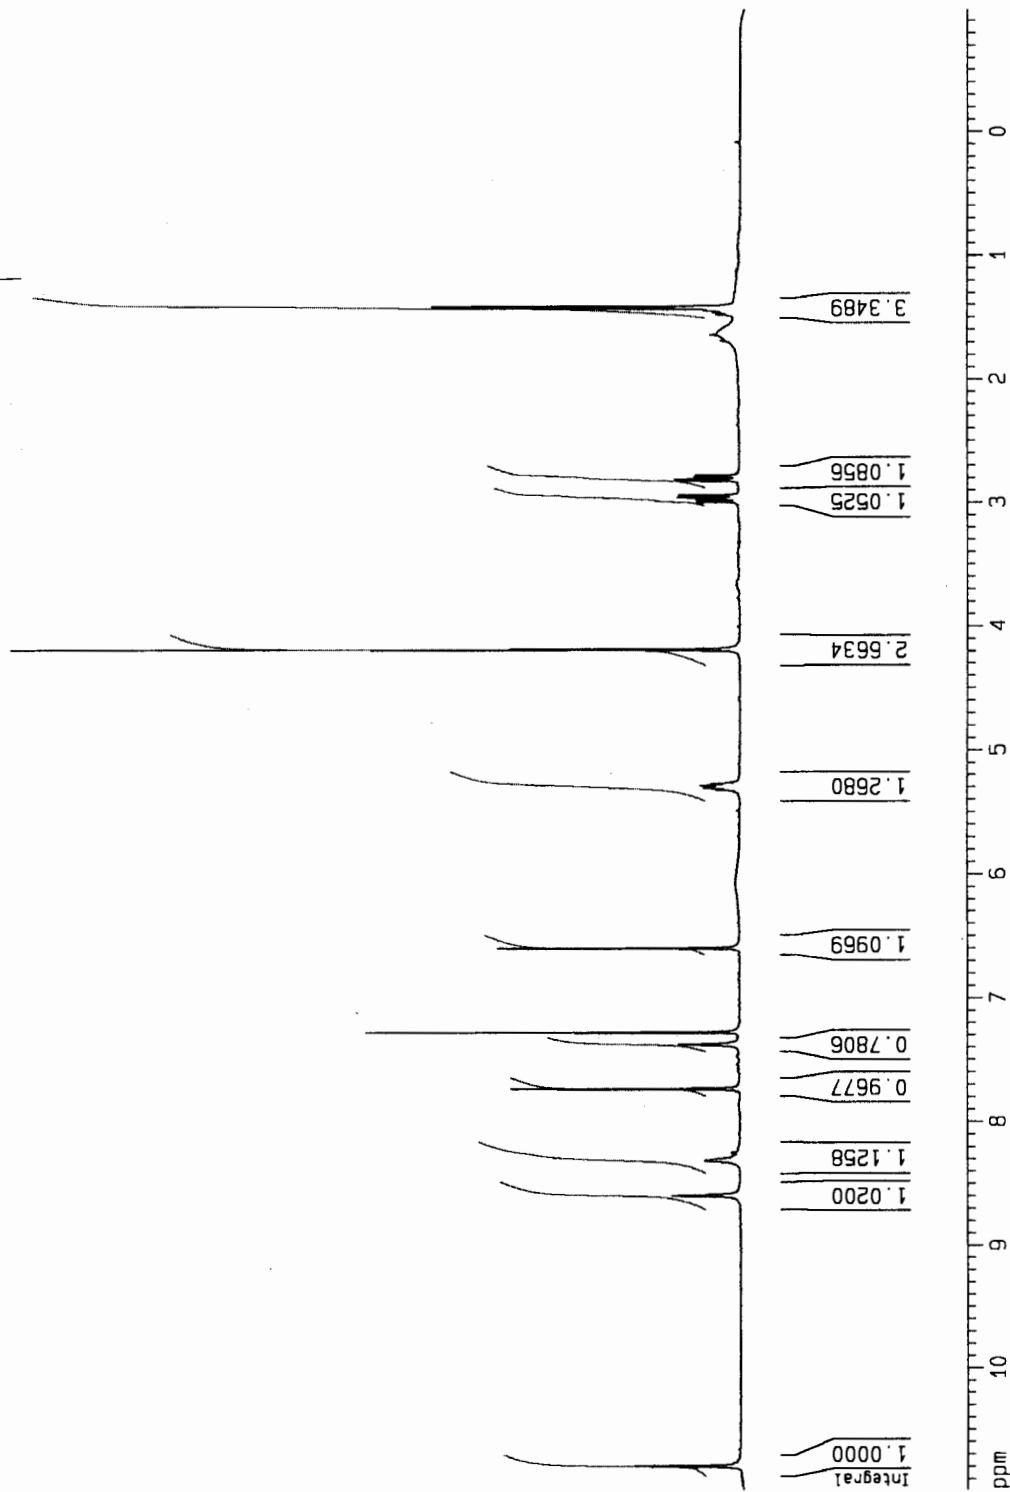

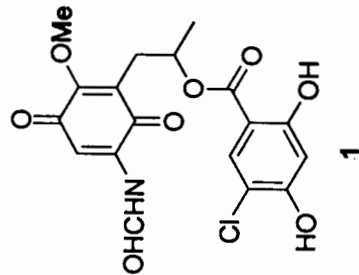

Current Data Parameters  
 NAME sg-173  
 EXPNO 2  
 PROCNO 1

F2 - Acquisition Parameters  
 Date\_ 20031019  
 Time 19.00  
 INSTRUM drx400  
 PROHD 5 mm Multinuc1  
 PULPROG zgpg30  
 TD 65536  
 SOLVENT CDCl3  
 NS 7000  
 DS 2  
 SWH 23148.148 Hz  
 FIDRES 0.353213 Hz  
 AQ 1.4156276 sec  
 RG 32768  
 DW 21.600 usec  
 DE 4.50 usec  
 TE 300.0 K  
 D1 0.05000000 sec  
 d11 0.03000000 sec  
 d12 0.0002000 sec

===== CHANNEL f1 =====  
 NUC1 13C  
 P1 12.30 usec  
 PL1 2.00 dB  
 SFO1 100.6232933 MHz

===== CHANNEL f2 =====  
 CPDPRG2 waltz16  
 NUC2 1H  
 PCPD2 100.00 usec  
 PL2 0.00 dB  
 PL12 18.00 dB  
 PL13 18.00 dB  
 SFO2 400.1316005 MHz

F2 - Processing parameters  
 SI 32768  
 SF 100.6127290 MHz  
 WDW EM  
 SSB 0  
 LB 1.00 Hz  
 GB 0  
 PC 1.40

1D NMR plot parameters  
 CX 20.00 cm  
 CY 50.00 cm  
 F1P 215.000 ppm  
 F1 21631.74 Hz  
 F2P -5.000 ppm  
 F2 -503.06 Hz  
 PPMCM 11.00000 ppm/cm  
 HZCM 1106.73999 Hz/cm

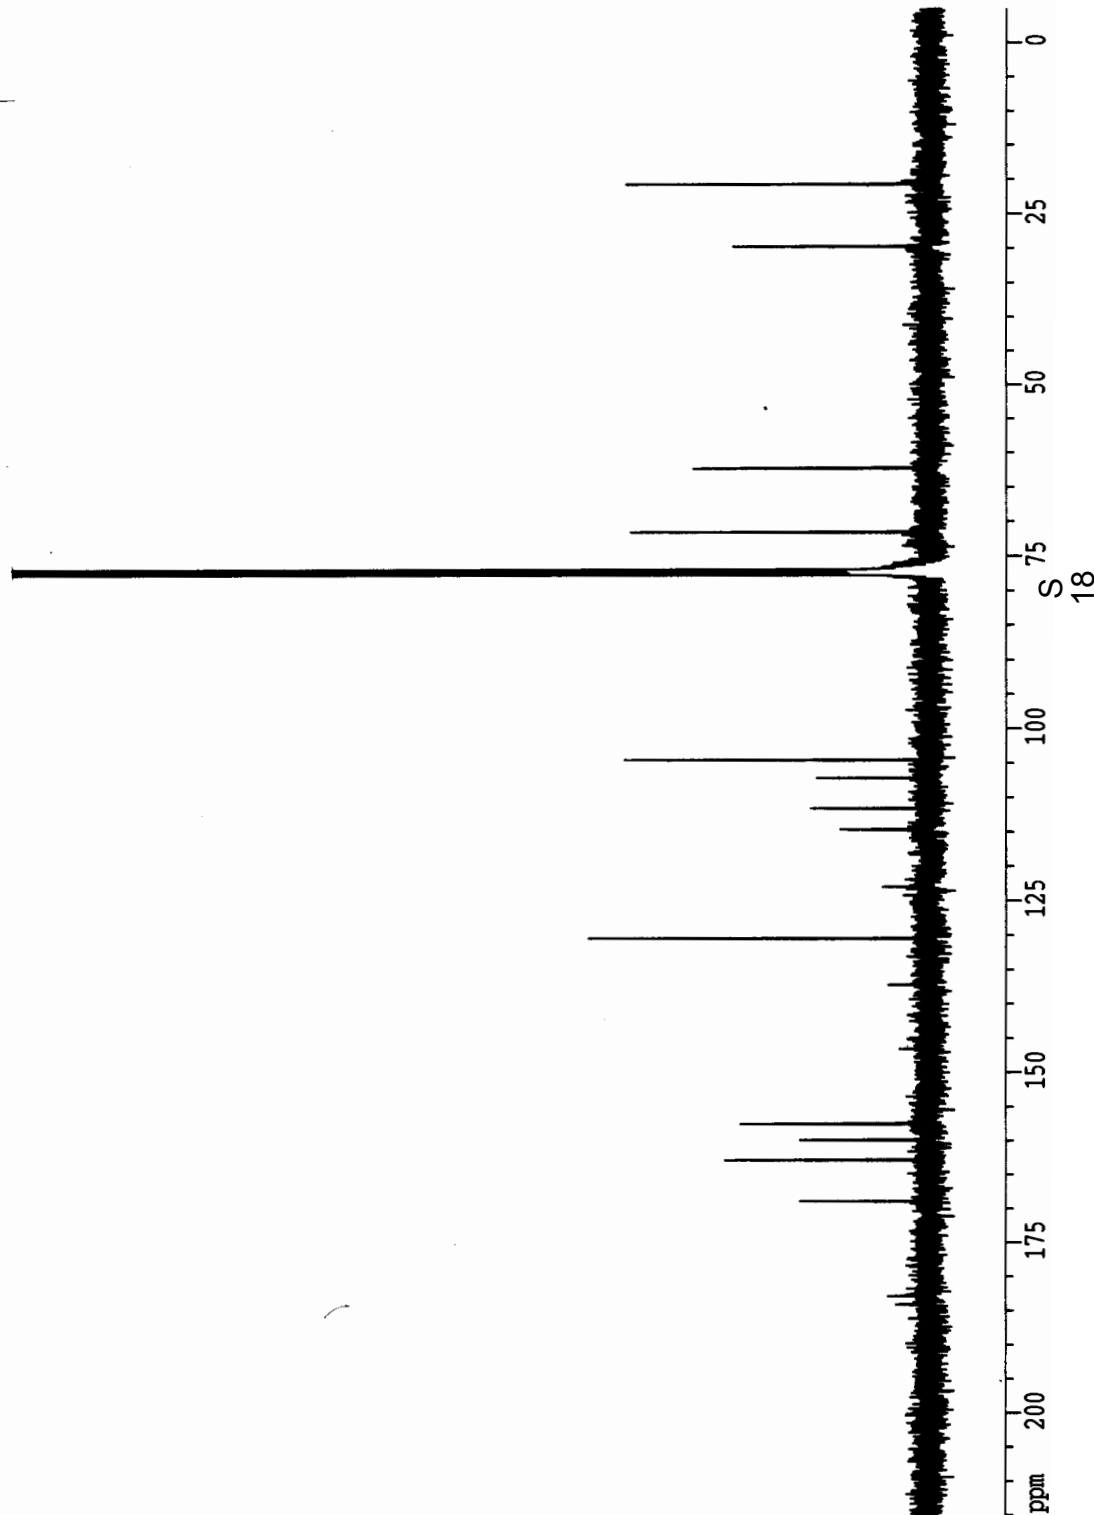

Supplement: Supplementary file 1 [file 5122492]
